1 Improving the quality of anthropometric  
2 measures during medical consultations  
3 with children aged under five years old in  
4 Burkina Faso

5  
6 Aziza Merzouki<sup>a,\*,#</sup>, Wessel Valkenburg<sup>b,#</sup>, Marc Bayala<sup>c</sup>, Maroussia Roelens<sup>a</sup>, Olivia Keiser<sup>a</sup>,  
7 Amara Amara<sup>b</sup>

8 <sup>a</sup> Institute of Global Health, University of Geneva, Geneva, Switzerland

9 <sup>b</sup> Terre des Hommes Foundation, Lausanne, Switzerland

10 <sup>c</sup> Terre des Hommes Foundation, Ouagadougou, Burkina Faso

11  
12 \*Corresponding author:

13 Aziza Merzouki, PhD

14 Institute of Global Health, University of Geneva

15 Chemin des Mines 9, 1202 Geneva, Switzerland

16 Tel. +41 78 712 56 46

17 [FatmaAziza.Merzouki@unige.ch](mailto:FatmaAziza.Merzouki@unige.ch)

18  
19 \*Alternate corresponding author:

20 Amara Amara, PhD

21 Avenue de Montchoisi 17, 1006 Lausanne, Switzerland

22 Tel. +33 6 45 01 13 49

23 amara.amara@tdh.ch

24  
25 # these authors contributed equally

26 Word count: Abstract 242 words; main text 2994 words; 6 figures; 1 supplementary material  
27 file

## 28 Abstract

29 **Objective:** Millions of medical consultations are conducted each year in Burkina Faso using  
30 the Electronic Register of Consultations (REC). Based on the consultation data collected, we  
31 present a method to quantify the quality of individual and ensembles of consultations  
32 conducted by frontline healthcare workers (FHWs).

33

34 **Methods:** We focus on anthropometric measurements and vital signs (age, weight, height,  
35 mid-upper arm circumference and temperature) of children aged between two months and  
36 five years old. We compare individual and ensemble of consultations to a multivariate  
37 probability distribution defined by an external population-specific, gold standard consultation  
38 dataset. By comparing the distributions of consultations to the reference probability  
39 distribution, we define a score to rate the quality of measurements and data entry of each  
40 FHW.

41

42 **Findings:** The defined scores allow us to detect which measurements are most problematic.  
43 They also allow us to detect potential biases in the consultation and treatment of different  
44 patient groups. No systematic gender-bias was found among FHWs. Height measurements  
45 were the most challenging; consultations with the lowest scores were associated with  
46 underestimated heights in children. Among these consultations, height was found to be even  
47 more underestimated among boys than girls.

48

49 **Conclusion:** Our findings enable us to support capacity building of frontline healthcare  
50 workers. The REC can be enriched with real-time specific alert on errors, individual FHW can  
51 be proposed targeted trainings, and dynamic dashboards can support district managers to  
52 navigate the entire population of FHWs and understand which problems should be prioritised.

53

## 54 Research in context

### 55 Knowledge before this study

56 The use of the Electronic Register of Consultations (REC) improved Frontline Healthcare  
57 Workers' (FHWs) adherence to the Integrated Management of Childhood Illness (IMCI)  
58 guidelines at the primary care level in Burkina Faso. The improvement included a better  
59 identification of danger signs and an increase in the proportion of correctly classified children  
60 under five years old. A former study reported how FHWs perceived the use and impact of the  
61 REC in their daily practice. While a high degree of satisfaction was expressed, FHWs also  
62 proposed improvements. FHWs proposed to increase the frequency of supervision and  
63 evaluation visits, which usually take place every three months. Supervision from district teams  
64 and coaches was globally positively perceived by FHWs, as it allowed them to identify and  
65 address errors, and therefore helped them to learn and improve. FHWs also proposed  
66 receiving compensations or prizes for the best health centres according to the evaluations.

### 67 Contribution of this study

68 In this study, we proposed a method to assess the quality of consultations conducted by  
69 FHWs. We focused on anthropometric measurements and vital signs that are systematically  
70 measured by FHWs during consultations of children aged between two months and five years  
71 old. We showed how this method can feed a live alert system that invites FHWs to verify their  
72 input in-real time when potential errors in specific measurements or data entries are  
73 identified. We found that height (length) measurements of children were the most  
74 challenging, as height (length) was frequently underestimated. Finally, we presented a  
75 dynamic dashboard that informs health district managers on the quality of care across the  
76 country (using a medal reward system), so they can prioritize their interventions and provide  
77 FHWs with targeted support to improve their skills.

## 78 Introduction

79 The burden of under-five mortality in West Africa is high. Out of 1000 live births in Burkina  
80 Faso in 2019, 87 children died before the age of five (1); the leading causes of these deaths  
81 are preventable or treatable conditions (2,3). In comparison, the under-five mortality rate in  
82 Europe and Northern America was five deaths per 1000 live births in 2019 (4). To reduce the  
83 morbidity and mortality of children aged under five years in low- and middle-income  
84 countries, WHO and UNICEF developed the Integrated Management of Childhood Illness  
85 (IMCI) protocol, which supports the combined treatment of major childhood illnesses (5,6).

86  
87 The paper-based IMCI was digitalized by Terre des hommes (Tdh) and the Ministry of Health  
88 (MoH) in Burkina Faso, who co-created leDA (the Integrated e-Diagnostic Approach) to  
89 improve adherence to IMCI. leDA includes the Electronic Register of Consultations (REC), a  
90 mobile application that runs on Android-based tablets and guides frontline healthcare  
91 workers (FHWs) through IMCI to diagnose sick children. The deployment of leDA in Burkina  
92 Faso has been growing steadily, covering 67% of all primary healthcare centres (PHCs) in the  
93 country by 2021. It is used by thousands of FHWs during the consultations of millions of  
94 children each year.

95  
96 Using machine learning, important work was done to leverage the large amount of  
97 consultation data collected with leDA (7). leDA data were analysed to: (i) predict epidemic  
98 outbreaks(8,9), (ii) deploy smart dashboards to inform and support decision makers, and (iii)  
99 build FHWs capacity to improve the quality of care (10).

100  
101 During a consultation using the REC, the FHW answers a series of questions related to the  
102 child's anthropometry, vital signs, clinical signs and reported symptoms. The accuracy of the  
103 FHW's answers and his input data are key to a high-quality consultation; the consultation  
104 process, the final diagnostic classification and the recommended treatment depend on these  
105 data. Very few FHWs who conduct consultations are medical doctors; most of them  
106 are nurses, itinerant healthcare workers and midwives. FHWs using the REC are keen to get  
107 feedback on their performance and willing to know how they compare to their peers (11).

108 Moreover, managers of PHCs and health districts show a strong interest to be continually  
109 informed on how FHWs perform and how they could support their work.

110

111 To define what is a high- or low-quality consultation, one needs to define a reference. We can  
112 use the REC database itself as a reference and compare each FHW's input to the typical input  
113 over the entire country. This would be equivalent to an anomaly (outlier) detection. However,  
114 a weakness of this approach is the possibility of systematic errors which are made by all FHWs  
115 collectively and may lead to potential biases. The other possibility, which we use in this study,  
116 is to consider an external database consisting of consultations made by experts, which may  
117 serve as a reference (12,13).

118

119 We focus on anthropometric measurements, which are essential to assess the growth and  
120 nutritional status of the child (3,14), and on vital signs (temperature), that are systematically  
121 measured by FHWs during consultations of children aged between two months and five years  
122 old. We propose a method to quantify the quality of a single consultation and an ensemble of  
123 consultations conducted by FHWs. We use this method to feed a live alert system that  
124 identifies potential errors in specific measurements or data entries. We explore if this method  
125 reveals any bias in the treatment of boys versus girls. Finally, we present a dynamic  
126 dashboard that provides managers with an overview on the quality of care across the  
127 country so they can support FHW improve their skills.

## 128 Methods

### 129 Data

130 Data from leDA includes over nine million consultations, increasing by approximately 200'000  
131 consultations per month. During each consultation, the following information is systematically  
132 recorded in real time: age, height (length in case of infants), weight, mid-upper arm  
133 circumference (MUAC) and temperature. Z-scores of weight-for-height, height-for-age and  
134 weight-for-age are calculated and also recorded. These z-scores are based on the WHO  
135 worldwide standard model for growth of children(15). Our main analysis includes data from  
136 all consultations conducted during 2020 using the REC, across the country.

137  
138 To rate the quality of consultations, we use an external database as a reference. We use  
139 aggregated statistics from data collected during an earlier project (12,13,16), which we will  
140 refer to as 'the audit data' from here on. This audit data was collected between 2014-2017 by  
141 specifically trained IMCI experts during the consultations of children aged between two  
142 months and five years old, in eight districts (Solenzo, Nouna, Dedougou, Boromo, Toma,  
143 Goursi, Ouahigouya and Titao) in Burkina Faso. The aim of this former study was to determine  
144 whether leDA increases adherence to IMCI and hence improves the quality of care for children  
145 in PHCs. Due to data-protection, we could not work with the raw audit data. We could  
146 however access the means of weight-for-height, height-for-age and weight-for-age z-scores,  
147 temperature and MUAC, as well as the covariance matrix of these five variables.

### 148 Reference model

149 We make the hypothesis that the distribution of patients over the five-dimensional real space  
150 of weight-for-height, height-for-age and weight-for-age z-scores, temperature and MUAC is a  
151 multivariate Gaussian distribution,

$$152 \quad P(\vec{x}) = (2\pi)^{-\frac{k}{2}} |\Sigma|^{-\frac{1}{2}} e^{-\frac{1}{2}(\vec{x}-\vec{\mu})^T \Sigma^{-1} (\vec{x}-\vec{\mu})} \quad (1)$$

153 where  $\vec{x}$  is the  $k$ -dimensional vector describing a single observation,  $k = 5$  is the number of  
154 degrees of freedom,  $\Sigma$  is the  $k \times k$  positive-definite covariance matrix of the model  
155 (estimated from the data),  $|\Sigma|$  is the determinant of the matrix  $\Sigma$ , and  $\vec{\mu}$  is the vector

156 containing the mean values of the  $k$  variables. The reference model of ‘good quality of care’  
157 is then fully defined once  $\vec{\mu}$  and  $\Sigma$  are known.

## 158 Individual consultations

159 We first assign a score to individual consultations (data points in the space of anthropometric  
160 z-scores, temperature and MUAC); representing the probability that the combination of  
161 entered values is accurate. This score allows us to raise a live alert to the FHW when erroneous  
162 input data is suspected. With the multivariate Gaussian reference model, the probability  
163 density associated with an individual consultation, is given by Equation 1. We trigger an alert  
164 when the probability density is lower than a threshold, corresponding to the worst 10%  
165 consultations in the database for year 2020. The threshold was set to avoid doing harm to the  
166 willingness of FHWs to use the tool at all.

167

168 The second step consists in identifying the most suspicious input data in order to guide the  
169 FHW in real time to check specific measurements and entries. Therefore, we analyse  
170 separately the five variables MUAC, temperature and three z-scores, denoted as  $x_i$ , with  $i =$   
171  $1 \dots 5$ , and compute individual variable scores  $score_i = \frac{x_i - \mu_i}{\sigma_i}$ , given the reference experts’  
172 means  $\mu_i$  and standard deviations  $\sigma_i$ . Any  $x_i$  is suspect when  $|score_i| > thresh_i$ , with  
173  $thresh_i = 3, \forall i$ . When  $score_i < -thresh_i$  or  $score_i > thresh_i$ ,  $x_i$  is considered extremely  
174 low or extremely high, respectively.

175 When MUAC and temperature are identified as extreme ( $|score_{MUAC}| > thresh_{MUAC}$  and  
176  $|score_{temperature}| > thresh_{temperature}$ ), the FHW is directly informed by an alert message  
177 in the REC and invited to check the input values. Weight, height and age are identified as being  
178 abnormally low or high based on the combination of scores related to weight-for-age, height-  
179 for-age and weight-for-height (Supplementary Materials).

## 180 Ensembles of consultations over a given time period

### 181 Probability

182 We projected consultations  $\vec{x}$  on a new five-dimensional orthogonal space (with  
183 uncorrelated dimensions);  $\vec{x} \rightarrow \vec{y} = U^{-1}(\vec{x} - \vec{\mu})$ , where the column vectors of  $U$  are the  
184 (normalized) eigenvectors of the reference covariance matrix  $\Sigma$ .

185 For an ensemble of  $N$  consultations (done by a single FHW, in a single PHC) over a given time  
186 period ( $N$  draws from the reference distribution), the measured sample mean  $\hat{\mu}_{N,i}$  of a single  
187 component  $y_i$ , and its measured sample variance  $\hat{s}_{N,i}^2$  are distributed as Gaussian and  $\chi_{N-1}^2$   
188 respectively.

189 The probability density of an ensemble  $\{\vec{y}\}_N$  of  $N$  consultations, is then given by,

$$190 \quad P(\{\vec{y}\}_N) = \prod_i P(\hat{\mu}_{N,i}) P(\hat{s}_{N,i}^2). \quad (2)$$

191 For more details, including equations of  $P(\hat{\mu}_{N,i})$  and  $P(\hat{s}_{N,i}^2)$ , see Supplementary Material.

192  $P(\{\vec{y}\}_N)$  is the probability that the observed ensemble  $\{\vec{y}\}_N$  is generated by the reference  
193 model. This corresponds to the p-value of the null hypothesis that the consultations are done  
194 by an expert. The p-value informs us about the significance of a deviation from the reference  
195 model, but it does not necessarily inform us about the quality of the work. In fact, even for  
196 the same deviation from the reference model, a large number of consultations will lead to a  
197 much lower p-value than a small number of consultations (Figure A 1). Vice versa, different  
198 deviations from the reference model can lead to the same p-value, if the number of  
199 consultations differs accordingly.

### 200 Quality score

201 We aim at providing healthcare workers with an actionable feedback. The feedback consists  
202 of two parts: (i) an overall performance score to indicate how the quality of work of a FHW  
203 compares to their peers, and (ii) suggestions about which part of their work should be  
204 improved with priority. As a proxy for the quality score, we use Equation 2, which defines the  
205 probability density that an ensemble of consultations is drawn from the reference distribution  
206 (significance), where we fix the number  $N$  to a constant arbitrary value for all FHWs (Figure A  
207 2). This way, only the mean and variance of the consultation measurements are included in  
208 the calculation of the proxy for the quality score; ignoring the number of consultations that



209 gave rise to said mean and variance. To facilitate the interpretation of the score for any user,  
210 we define the score as the percentile of a FHW's score proxy, relative to the entire population  
211 of FHWs. The score therefore reflects a percentage-based ranking, and indicates how well the  
212 FHW performs compared to their peers.

213

214 Figure 1 and Figure A 3 illustrate that the proxy score is more suitable to measure quality, than  
215 the actual probability of these ensembles.

## 216 Gender Bias

217 In order to identify potential gender bias in measurements or data entry, we first compared  
218 the typical variation in the scores of individual FHWs over different time periods (quarters of  
219 a year), to the typical variation in their scores between boys and girls in the same time period.  
220 We also compared the distribution of scores and the frequency of suspicious input values  
221 (extremely low/high height, weight, MUAC, etc.) between girls and boys over all FHWs.  
222 Statistical significance was assessed using a two-proportion z-test.

## 223 Results

### 224 Detecting common problems

225 The following analysis includes 2,042,545 consultations (939,761 girls, and 1,202,784 boys)  
226 done in 2020, by 7,234 FHWs, in 1,150 PHCs from 39 districts. We compared the distributions  
227 of age, temperature, MUAC and the three anthropometric z-scores, i.e., height-for-age,  
228 weight-for-height and weight-for-age between the most suspicious consultations, which  
229 obtained the lowest scores (worst 0.3%), and the remaining (99.7%) consultations that got  
230 higher scores. The distributions are presented in Figure 2. Compared to the consultations with  
231 higher scores, the lowest score consultations had lower z-scores of height-for-age  
232 (median(IQR) -8.7(-7.5-(-9.8)) vs -2.1(-1.0-(-3.5))), higher z-scores of weight-for-height  
233 (median(IQR) 9.0(12.3-6.9) vs -0.2(0.8-(-1.1))), and were more frequent among younger  
234 children; 71.6% of consultations with the lowest 0.3% scores involved children under 20  
235 months old vs 40.8% among the remaining 99.7% of consultations. Consultations that involved  
236 overweight children (weight-for-age z-score > 2) were also more frequent among the  
237 consultations with the lowest scores (15.8% vs 0.5% among consultations with higher scores).

238 When identifying the specific inputs (among age, weight, height, MUAC and temperature)  
239 with extreme (low or high) values, height underestimation was the most frequent, followed  
240 by weight overestimation. Consultations with the 0.3% least likely combinations of  
241 anthropometric and vital signs entries underestimated height in 88% of cases and  
242 overestimated weight in 14%; see Figure 3 (left). These numbers correspond to 29% of height  
243 underestimation and 2% of weight overestimation among the 10% consultations with the  
244 lowest scores. Figure 3 (right) presents the evolution of the frequency of underestimated and  
245 overestimated input variables as a function of the selected score threshold (varying from the  
246 lowest 0.3% to the lowest 40% scores). Reproducing the analysis for consultations conducted  
247 in 2019 and 2018 provided similar results (Supplementary Material).

## 248 [Gender bias in primary healthcare](#)

249 Figure 4 shows that the inter-seasonal variation in quality of care is larger than the variation  
250 between boys and girls, as the former is more skewed to the right. We can therefore not  
251 demonstrate any systematic gender bias. Considering ensemble of consultation scores of  
252 individual FHWs, Figure A 4 shows that only FHWs with fewer consultations had a larger  
253 difference in scores between girls and boys. Figure A 5-7 show how the large discrepancy in  
254 scores can be explained by outliers having a large impact on the score when the sample size  
255 is limited (<1000 consultations).

256 Despite the similar overall distribution of scores between girls and boys, the lowest scores for  
257 boys were even more extreme (lower) than for girls (see Figure A 8). Among the consultations  
258 with the lowest scores (0.3%; 2,818/939,761 girls; 3,316/1,202,784 boys), the most significant  
259 difference between the consultations for girls and boys with the lowest scores involved height  
260 measurement (Figure 5). Height in girls was less often underestimated than height in boys  
261 (84% for girls; 90% boys;  $p < 0.01$ ).

## 262 [Live alerts](#)

263 The REC was expanded to estimate in real time the score of anthropometric and vital signs  
264 values that are systematically entered by a FHW during a consultation. When a consultation  
265 gets a low score, suspicious values (extremely low or high) are identified, and an alert message  
266 invites the FHW to check their entries. In case of a confirmed measurement or data entry

267 error, the FHW can correct the input value and continue the consultation. Figure A 9 presents  
268 screenshots of the expanded REC application.

## 269 Dynamic dashboards for managers

270 A dynamic dashboard was implemented (using Tableau Desktop 2020.3 software) and made  
271 accessible online to provide health centre and district managers with an up-to-date overview  
272 of the PHC score distributions across the country (see Figure 6). In this dashboard, each PHC  
273 was represented by the ensemble of all consultations (focusing on anthropometry and  
274 temperature data entries) conducted in this site. Depending on the scores obtained, PHCs  
275 were categorized in three categories: gold, silver and bronze (details in Supplementary  
276 Material). To help identify the measurements that are the most suspicious in a selected PHC  
277 and that lead to a lower quality score, the distribution of all consultations of the PHC are  
278 displayed (as a scatter plot) together with the reference model (orange lines) for comparison.  
279 In a separate panel, the proportion of gold, silver and bronze medals per health district are  
280 also presented. Districts in the Northern and Eastern parts of Burkina Faso (e.g., Dori, Diapaga)  
281 had higher percentages of bronze PHCs, while districts in the Western part of the country (e.g.,  
282 Tougan, Tenado) had a majority of silver and gold PHCs.

## 283 Discussion

284 Using a multivariate gaussian model, we quantified the quality of anthropometric measures  
285 and vital signs as entered by FHWs during consultations of children aged from two months to  
286 five years old. The quality measure of individual consultations was used to feed a live alert  
287 system that identifies suspect input values of age, height, weight, MUAC and temperature.  
288 The quality measure of ensembles of consultations were used to identify suspect behaviours  
289 among FHWs based on all the consultations they have conducted during a specific time period.

290

291 Among the lowest score consultations, height measurements were the most problematic, as  
292 height was frequently underestimated. The challenge when measuring a child's height  
293 (length) lies in the difficulty to keep him fully stretched and still, especially when the child is  
294 crying and struggling (19). Among the consultations with the lowest scores, height was  
295 significantly more underestimated for boys than for girls, which may be associated to higher  
296 activity levels in boys (20–22).

297

298 Bronze medals were more frequent in the Northern and Eastern districts of Burkina Faso,  
299 while Western Districts had a majority of silver and gold medals. In addition to differences in  
300 the quality of anthropometric and vital signs measures, this geographical heterogeneity could  
301 also reflect variations in socioeconomic and nutritional status across the country (17,18).  
302 Previous reports showed that food insecurity is the most prevalent in the Sahel (Northern)  
303 and East regions. If these geographical differences and local child population characteristics  
304 are confirmed, the reference model will be adapted accordingly for a more accurate  
305 estimation of FHWs' quality of work.

306

307 Our analyses have some limitations. As a reference of what is a high-quality consultation, we  
308 used aggregated statistics of experts consultation data (12,13,16). This choice has  
309 weaknesses, including that (i) the statistics were computed over a finite number of  
310 consultations (order of 1500), and that the reference distribution is only measured up to a few  
311 percent accuracy, (ii) the data were collected in a different period than the period in which we  
312 tested the quality of care, (iii) the data covered a subset of districts only, (iv) the data were  
313 collected by only two trained nurses, which may lead to biased results due to the limited  
314 sample size.

315

316 In collaboration with the MoH, Tdh has initiated the regular collection of consultations  
317 performed by recognized experts, in order to recalibrate the reference model and keep it as  
318 close to the real population as possible. Data collection will be done over a heterogeneous  
319 sample of the population, and cover different regions and seasons. As we worked with  
320 aggregated audit data, we made the simplifying hypothesis that the distribution of patients  
321 over the five-dimensional real space of anthropometric and vital signs variables follows a  
322 multivariate gaussian distribution. The validity of this assumption and of the audit data will be  
323 tested in the future, when the above-mentioned dataset of expert consultations becomes  
324 available. As a future work, we will further explore potential factors associated with lower  
325 consultation scores (e.g., FHW's workload, time at which data are entered in the REC), and  
326 focus on the quality of reported symptoms and classifications.

## 327 Conclusion

328 By developing a method that uses a large dataset to qualify the healthcare provided to  
329 children in a low-resource setting, we showed how we can foster capacity building through  
330 automated personal live feedbacks and dynamic dashboards informing district managers'  
331 decision-making, and explore potential biases in the quality of healthcare.

## 332 Acknowledgements

333 The authors thank Antoine Geissbuhler, Seydou Toguiyeni, Noël Nacoulma, Noël Zonon,  
334 Florian Triclin, Iveth Gonzalez, Sandrine Busiere, Riccardo Lampariello, the leDA team of  
335 Terre des hommes in Burkina Faso and the Ministry of Health from Burkina Faso for their  
336 input and fruitful discussions.

## 337 Funding

338 This work was funded by the Cloudera Foundation, and technically supported by the  
339 Cloudera Foundation and the Tableau Foundation.

## 340 Conflict of interest

341 We declare no competing interests.

## 342 References

- 343 1. Burkina Faso (BFA) - Demographics, Health & Infant Mortality [Internet]. UNICEF  
344 DATA. [cited 2021 Mar 3]. Available from: <https://data.unicef.org/country/bfa/>
- 345 2. Sanyang Y. Prevalence of under-five years of age mortality by infectious diseases in  
346 West African region. *Int J Afr Nurs Sci*. 2019 Jan 1;11:100175.
- 347 3. Caulfield LE, de Onis M, Blössner M, Black RE. Undernutrition as an underlying cause  
348 of child deaths associated with diarrhea, pneumonia, malaria, and measles. *Am J Clin Nutr*.  
349 2004 Jul;80(1):193–8.
- 350 4. UNICEF, WHO, World Bank Group. Levels and Trends in Child Mortality [Internet].  
351 2020 [cited 2021 Apr 13]. Available from: [https://www.unicef.org/media/79371/file/UN-](https://www.unicef.org/media/79371/file/UN-IGME-child-mortality-report-2020.pdf)  
352 [IGME-child-mortality-report-2020.pdf](https://www.unicef.org/media/79371/file/UN-IGME-child-mortality-report-2020.pdf)
- 353 5. Gera T, Shah D, Garner P, Richardson M, Sachdev HS. Integrated management of  
354 childhood illness (IMCI) strategy for children under five. *Cochrane Database Syst Rev*

- 355 [Internet]. 2016 [cited 2021 Mar 3];(6). Available from:  
356 <https://www.cochranelibrary.com/cdsr/doi/10.1002/14651858.CD010123.pub2/full?cookies>  
357 Enabled
- 358 6. Gove S. Integrated management of childhood illness by outpatient health workers:  
359 technical basis and overview. The WHO Working Group on Guidelines for Integrated  
360 Management of the Sick Child. Bull World Health Organ. 1997;75 Suppl 1:7–24.
- 361 7. Large-scale digitalized IMCI in Sub-Saharan Africa: on how AI can help decrease child  
362 mortality & morbidity, and predict epidemic outbreaks. [Internet]. [cited 2021 Feb 15].  
363 Available from: [https://gdhf2019.dryfta.com/program-schedule/program/65/artificial-](https://gdhf2019.dryfta.com/program-schedule/program/65/artificial-intelligence-and-machine-learning-applications-in-global-health)  
364 [intelligence-and-machine-learning-applications-in-global-health](https://gdhf2019.dryfta.com/program-schedule/program/65/artificial-intelligence-and-machine-learning-applications-in-global-health)
- 365 8. Faster reaction to epidemics: toward predicting outbreaks in Burkina Faso - AMLD  
366 [Internet]. [cited 2021 Mar 2]. Available from: <https://appliedmldays.org/highlights/84>
- 367 9. Harvey D, Valkenberg W, Amara A. Predicting Malaria Epidemics in Burkina Faso With  
368 Gaussian Processes [Internet]. Rochester, NY: Social Science Research Network; 2021 Feb  
369 [cited 2021 Mar 29]. Report No.: ID 3786697. Available from:  
370 <https://papers.ssrn.com/abstract=3786697>
- 371 10. Improving the quality of child consultations in Burkina Faso using ML: detecting and  
372 addressing Health Workers' diagnostic mistakes - AMLD [Internet]. [cited 2021 Mar 2].  
373 Available from: <https://appliedmldays.org/highlights/85>
- 374 11. Bessat C, Zonon NA, D'Acremont V. Large-scale implementation of electronic  
375 Integrated Management of Childhood Illness (eIMCI) at the primary care level in Burkina  
376 Faso: a qualitative study on health worker perception of its medical content, usability and  
377 impact on antibiotic prescription and resistance. BMC Public Health. 2019 Apr 29;19(1):449.
- 378 12. Blanchet K, Lewis JJ, Pozo-Martin F, Satouro A, Somda S, Ilboudo P, et al. A mixed  
379 methods protocol to evaluate the effect and cost-effectiveness of an Integrated electronic  
380 Diagnosis Approach (IeDA) for the management of childhood illnesses at primary health  
381 facilities in Burkina Faso. Implement Sci IS [Internet]. 2016 Aug 4 [cited 2021 Feb 11];11.  
382 Available from: <https://www.ncbi.nlm.nih.gov/pmc/articles/PMC4973038/>
- 383 13. LSHTM. IeDA for the management of illness in under-five children at the primary  
384 health care level in Burkina Faso: Findings from a stepped-wedge cluster randomised trial  
385 [Internet]. 2018 [cited 2021 Feb 11]. Available from:  
386 [https://www.tdh.ch/sites/default/files/ieda\\_brochure.pdf](https://www.tdh.ch/sites/default/files/ieda_brochure.pdf)

- 387 14. WHO. Nutrition Landscape Information System (NLIS) country profile indicators:  
388 interpretation guide [Internet]. 2010 [cited 2021 Mar 8]. Available from:  
389 [https://www.who.int/nutrition/nlis\\_interpretation\\_guide.pdf](https://www.who.int/nutrition/nlis_interpretation_guide.pdf)
- 390 15. The WHO Child Growth Standards [Internet]. [cited 2021 Apr 13]. Available from:  
391 <https://www.who.int/tools/child-growth-standards/standards>
- 392 16. Sarrassat S, Lewis JJ, Some AS, Somda S, Cousens S, Blanchet K. An Integrated  
393 eDiagnosis Approach (leDA) versus standard IMCI for assessing and managing childhood  
394 illness in Burkina Faso: a stepped-wedge cluster randomised trial. *BMC Health Serv Res*. 2021  
395 Apr 16;21(1):354.
- 396 17. World Bank Group. Burkina Faso Poverty, Vulnerability, and Income Source  
397 [Internet]. 2016 Jun [cited 2021 Mar 24]. Report No.: 115122. Available from:  
398 [http://documents1.worldbank.org/curated/en/392811495031260225/pdf/Burkina-Faso-](http://documents1.worldbank.org/curated/en/392811495031260225/pdf/Burkina-Faso-poverty-and-vulnerability-analysis.pdf)  
399 [poverty-and-vulnerability-analysis.pdf](http://documents1.worldbank.org/curated/en/392811495031260225/pdf/Burkina-Faso-poverty-and-vulnerability-analysis.pdf)
- 400 18. Zon H, Pavlova M, Groot W. Regional health disparities in Burkina Faso during the  
401 period of health care decentralization. Results of a macro-level analysis. *Int J Health Plann*  
402 *Manage*. 2020;35(4):939–59.
- 403 19. WHO MULTICENTRE GROWTH REFERENCE STUDY GROUP, Onis M. Reliability of  
404 anthropometric measurements in the WHO Multicentre Growth Reference Study: WHO  
405 Multicentre Growth Reference Study Group. *Acta Paediatr*. 2007 Jan 2;95:38–46.
- 406 20. Ellis L, He P. Sex differences in fetal activity and childhood hyperactivity. *Res J Dev*  
407 *Biol*. 2014 Apr 2;1(1):1.
- 408 21. Campbell DW, Eaton WO. Sex differences in the activity level of infants1. *Infant Child*  
409 *Dev*. 1999;8(1):1–17.
- 410 22. Almli CR, Ball RH, Wheeler ME. Human fetal and neonatal movement patterns:  
411 Gender differences and fetal-to-neonatal continuity. *Dev Psychobiol*. 2001;38(4):252–73.  
412

413

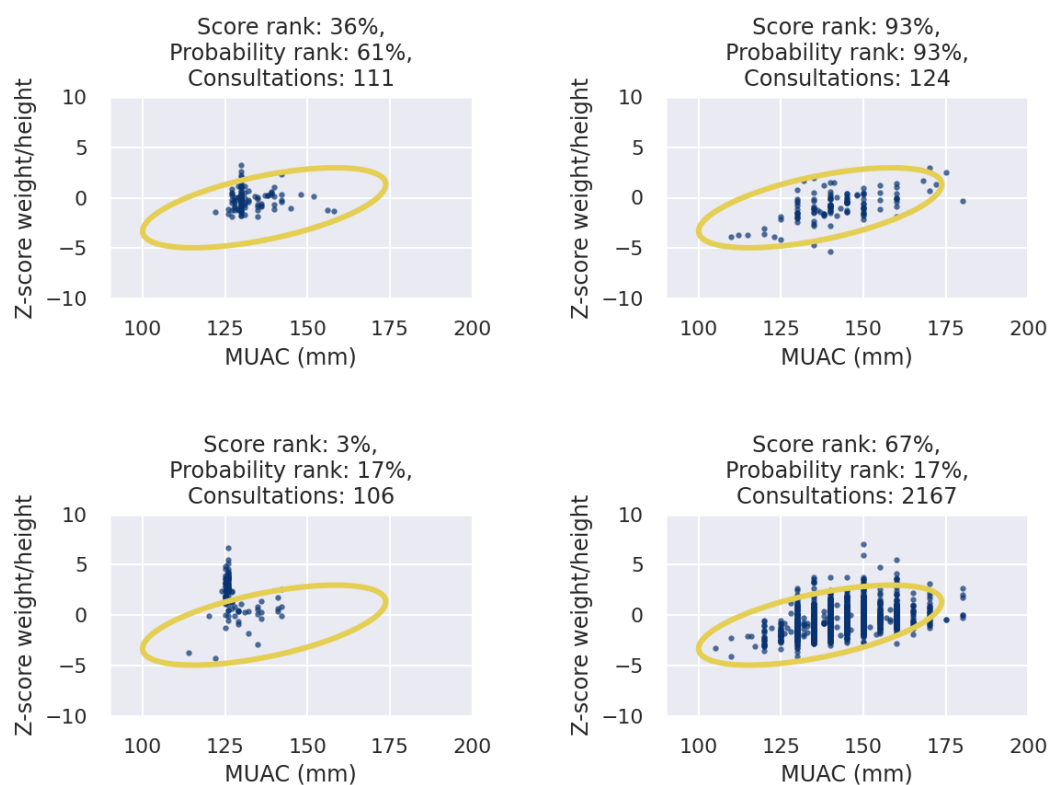

414

415 *Figure 1 2D projection of the consultations of four Frontline Healthcare Workers (FHWs), over Quarter 4 of 2020. Each dot*  
416 *represents one patient. The yellow reference contour is the 99% confidence level contour of the reference model which was*  
417 *derived from the audit data. Good quality healthcare is reflected by ensembles of consultations which are scattered within the*  
418 *reference contour. In these selected examples, the FHWs on the left clearly make repeated errors in the weight and height*  
419 *measurements of the patients. Our definition of score reflects correctly the difference in quality of care: ranked by score proxy,*  
420 *the FHWs on the left scores the worst (3% on bottom-left; and 36% on top-left), while the FHWs on the right scores best (67%*  
421 *on bottom-right; and 93% on top-right). However, due to the lower number of consultations (n=106) for the FHW in the lower*  
422 *left panel, the probability of its ensemble is the same as for the higher-scoring FHW in the lower right panel (with 2167*  
423 *consultations): ranked by probability both FHW's are in the worst 17%. Hence, the true probability is not a useful proxy for the*  
424 *quality score.*



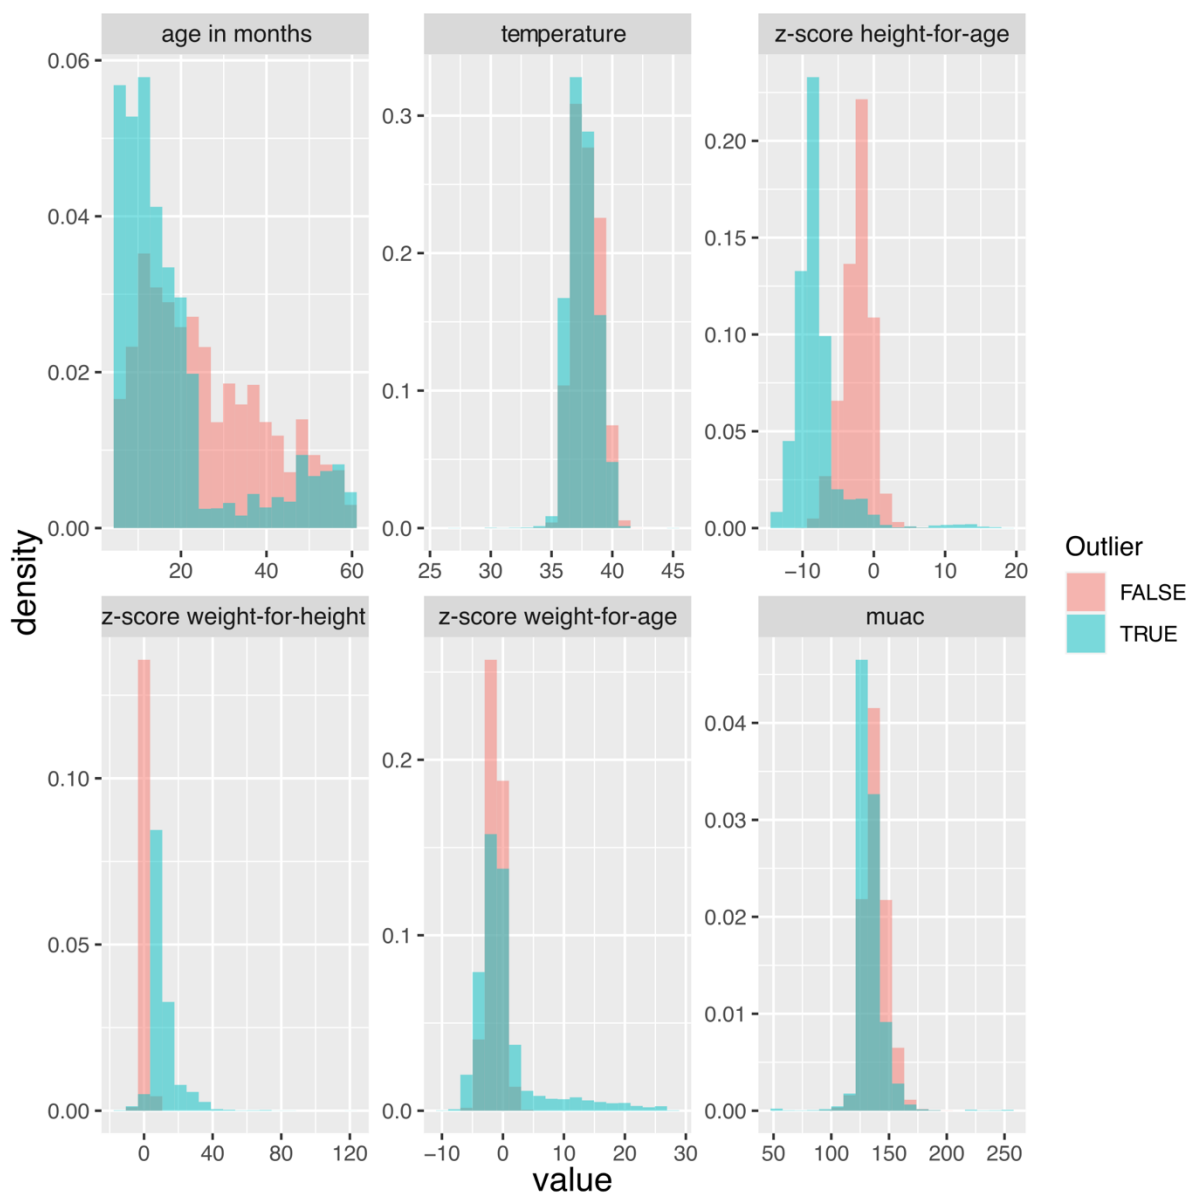

425

426

427

428

*Figure 2 Distribution of age, temperature, MUAC and three anthropometric z-scores among the consultations with the lowest 0.3% scores (denoted as Outlier = TRUE; coloured in blue), and among the remaining 99.7% consultations with higher scores (denoted as Outlier = FALSE; coloured in red).*

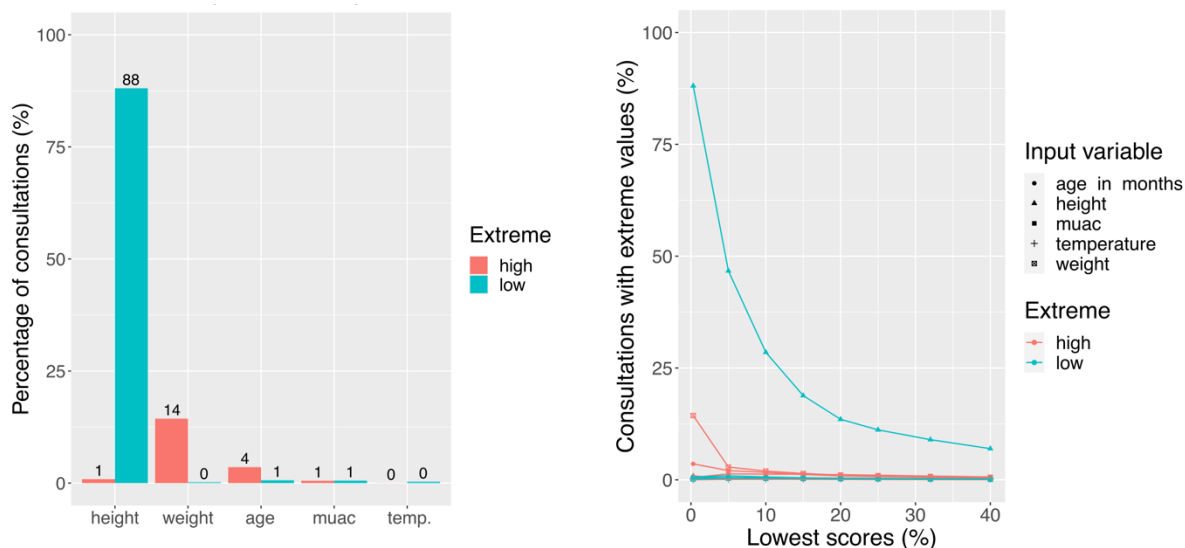

429 *Figure 3 (left) Percentage of extreme anthropometric and vital sign input values among the 0.3% consultations with the lowest*  
 430 *scores conducted in 2020 (6,113 /2,042,545 consultations). Blue and red bars represent the percentage of extremely low and*  
 431 *extremely high values, respectively. In comparison, we show in (right) the evolution of these percentages among the*  
 432 *consultations with the lowest 0.3% to 40% scores.*

433

434

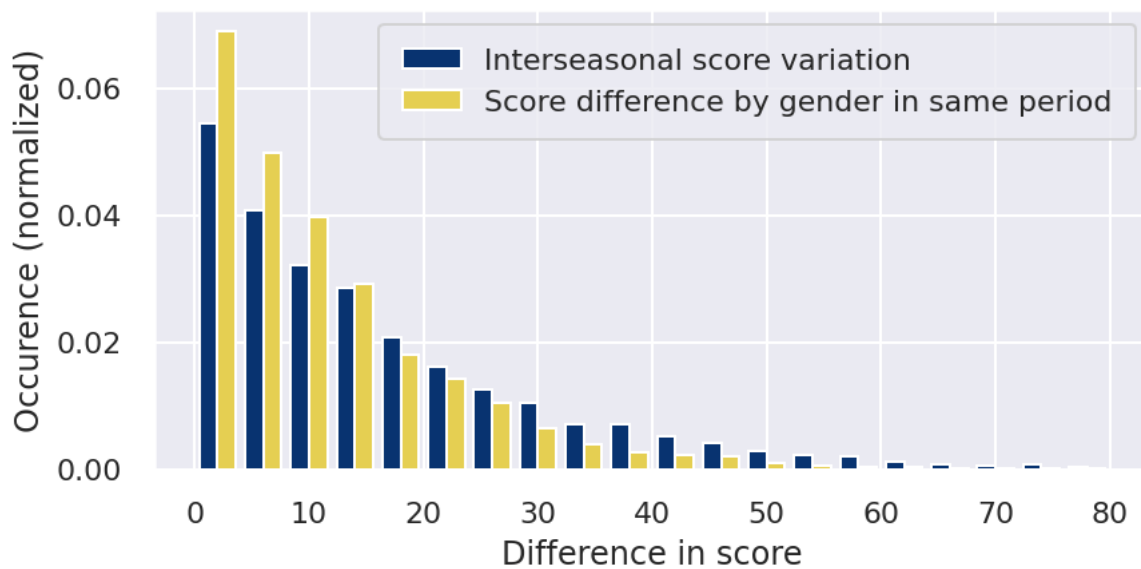

435

436 *Figure 4 Distribution of absolute difference in scores for the same FHW in different seasons (blue) and for the same FHW in*  
437 *one season but separating the score for boys and girls (yellow). The inter-gender score variation is more skewed toward the*  
438 *right.*

439

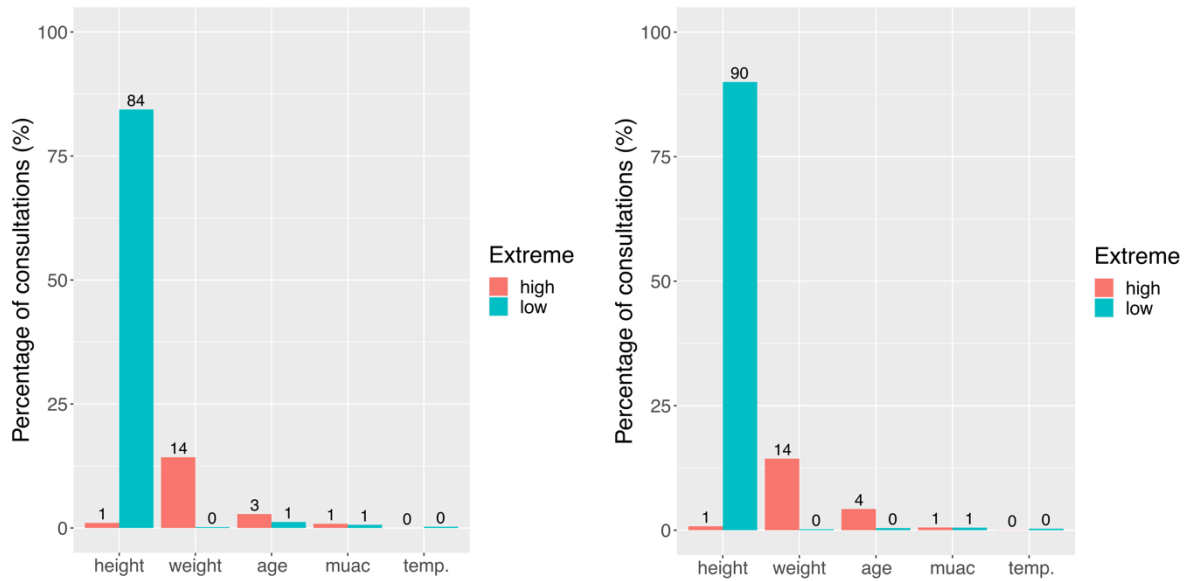

440 Figure 5 Percentage of extreme anthropometric and vital sign values among (left panel) girls' consultations (2,818/939,761  
 441 consultations), and (right panel) boys' consultations (3,316/1,202,784 consultations) with the 0.3% lowest scores conducted  
 442 in 2020. Blue and red bars represent the percentage of extremely low and extremely high values, respectively.

443

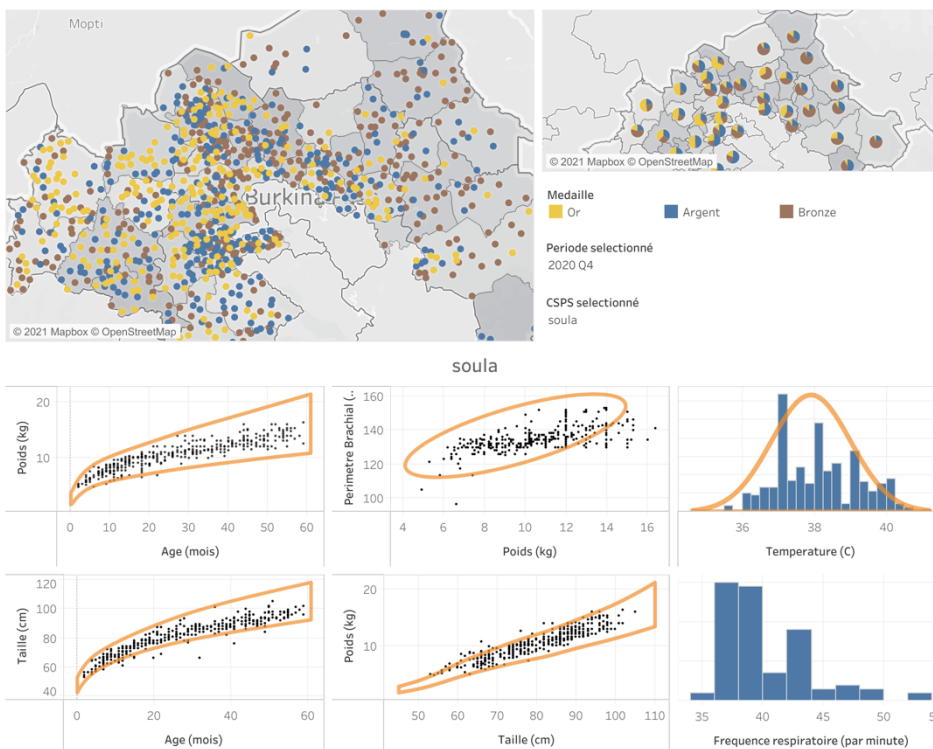

444  
 445 Figure 6 Dynamic dashboard presenting an overview of the PHC scores distributions. Each PHC is represented by the ensemble  
 446 of consultations that were conducted there during Quarter 4 of year 2020. PHCs are categorized in three categories: gold,  
 447 silver and bronze based on the obtained score.
